# Supplementary material for: A genome-wide CRISPR screen implicates plasma membrane asymmetry in exogenous C6-ceramide toxicity
Source: PubMed Central journal article supplement (PMC9793866; doi:10.1242/bio.059695), 2022-12-19
Supplement: biolopen-11-059695-s1.pdf [file biolopen-11-059695-s1.pdf]

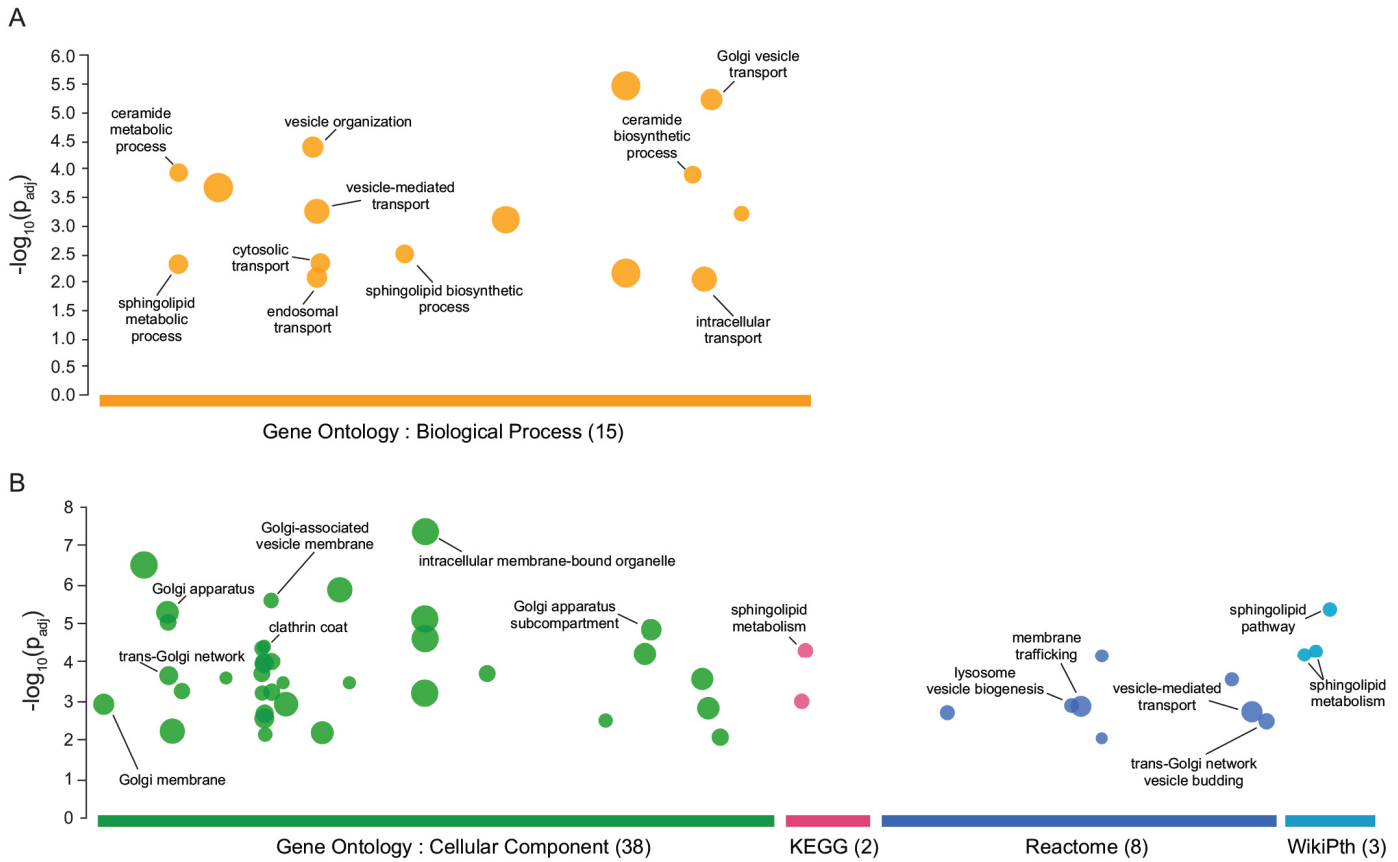

**Fig. S1. Analysis of C6-Cer genetic modifiers.**

Significantly enriched and disenriched genes from the genome-wide C6-Cer CRISPR screen were analyzed using g:Profiler to identify functional relationships.

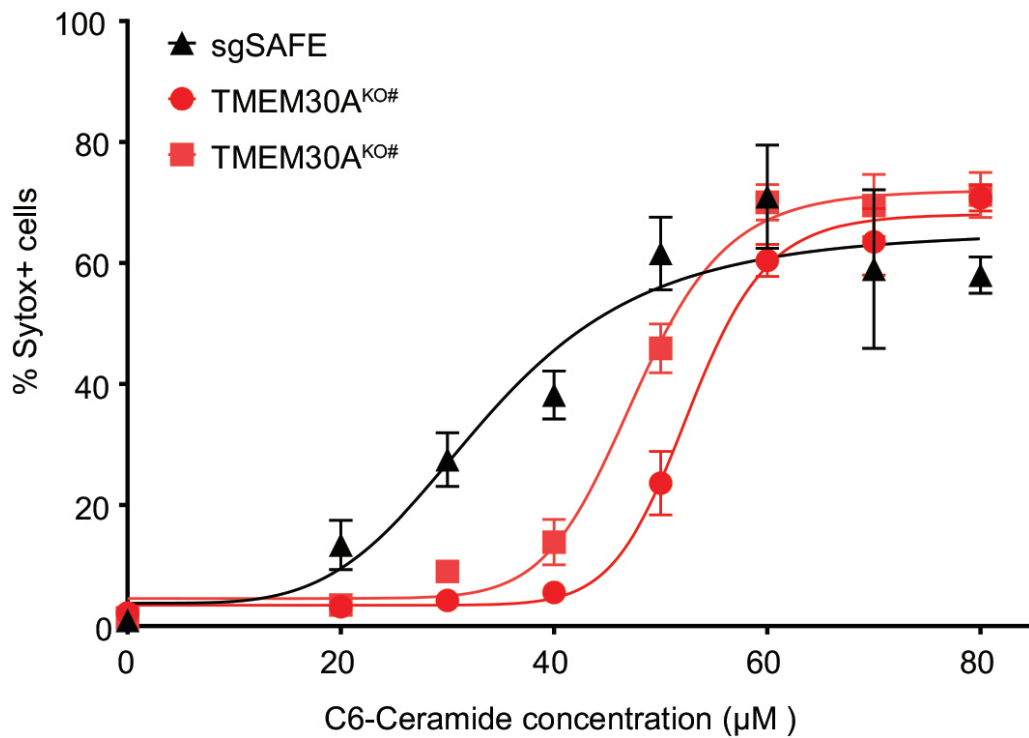

**Fig. S2. Loss of TMEM30A sensitizes cells to exogenous C6-Cer-induced cell death.**

K562 cells were treated with the indicated concentrations of C6-Cer for 24 hr and the percentage of dead cells (Sytox+) quantified using flow cytometry.

**Table S1.** CRISPR-Cas9 screen data.

[Click here to download Table S1](#)

**Table S2.** Surface proteome analysis.

[Click here to download Table S2](#)
